# Supplementary material for: In-depth phenotyping of lymphoblastoid cells suggests selective cellular vulnerability in Marinesco-Sjögren syndrome
Source: PubMed Central journal article supplement (PMC5620273; doi:10.18632/oncotarget.19663), 2017-07-28
Supplement: oncotarget-08-68493-s001.pdf [file oncotarget-08-68493-s001.pdf]

## In-depth phenotyping of lymphoblastoid cells suggests selective cellular vulnerability in Marinesco-Sjögren syndrome

### SUPPLEMENTARY MATERIALS

**Supplementary Table 1: List of all relatively quantified proteins from both analyses (label-free and iTRAQ experiments).** In both datasets, the normalized abundance values (NAVs) of eight individual samples (four biological replicates each of MSS patients and respective controls) were used to calculate a final ratio of MSS/control and Student's T-Test ( $p$ -value  $< 0.05$ ), respectively for each protein. For iTRAQ data, the NAVs were statistically treated in order to remove potential outliers as described in the data analysis part of materials and methods section

See supplementary File: 1

**Supplementary Table 2: Final list of significantly (see data analysis part of materials and methods section) differentially regulated proteins in MSS derived LCs obtained from both label-free and iTRAQ quantitative analyses**

See supplementary File: 2

**Supplementary Table 3: List of primary antibodies used for the immunohistochemistry and immunoblot studies of woody and control mouse tissues and MSS-patient and control proposita derived LCs**

| Antigene               | Source | Dilution immunohisto-chemistry | Dilution immuno-blotting | Company                        |
|------------------------|--------|--------------------------------|--------------------------|--------------------------------|
| Actin                  | rabbit | 1:100                          | 1:1000                   | BD Transduction Lab            |
| Ataxin-10              | rabbit | 1:100                          | 1:1000                   | Novus Biologicals              |
| BiP                    | rabbit | 1:100                          | 1:1000                   | BD Transduction Lab            |
| Calmodulin             | rabbit | 1:100                          | 1:1000                   | Genetex                        |
| CDC123                 | rabbit | 1:100                          | -                        | Genetex                        |
| Cytochrome C           | rabbit | 1:80                           | -                        | Merck Millipore                |
| peif2 $\alpha$ (Ser51) | rabbit | 1:100                          | -                        | Abcam                          |
| GAPDH                  | rabbit | -                              | 1:100                    | Genetex                        |
| GRP94                  | rabbit | 1:100                          | 1:100                    | Genetex                        |
| GRP170                 | rabbit | -                              | 1:1000                   | Genetex                        |
| PHGDH                  | rabbit | 1:80                           | 1:750                    | Genetex                        |
| RAB11-FIP1A            | rabbit | 1:80                           | 1:750                    | Abcam                          |
| SELH                   | rabbit | 1:50                           | 1:500                    | Provided by Prof. V. Gladyshev |
| Synuclein              | mouse  | 1:100                          | 1:500                    | Abcam                          |
